# Supplementary material
Source: PubMed Central journal article supplement (PMC5728340)

**Supplementary Table 1 - TruSight Myeloid (Illumina) NGS Gene Panel. (A) Genes in the TruSight Myeloid (Illumina) NGS Gene Panel (B) Exon coverage for hotspot genes**

**(A)**

| <b>Complete coding region coverage<br/>(15/54)</b> | <b>Hotspot coverage<br/>(39/54)</b> |
|----------------------------------------------------|-------------------------------------|
| <i>BCOR</i>                                        | <i>ABL1</i>                         |
| <i>BCORL1</i>                                      | <i>ASXL1</i>                        |
| <i>CDKN2A</i>                                      | <i>ATRX</i>                         |
| <i>CEBPA</i>                                       | <i>BRAF</i>                         |
| <i>CUX1</i>                                        | <i>CALR</i>                         |
| <i>DNMT3A</i>                                      | <i>CBL</i>                          |
| <i>ETV6/TEL</i>                                    | <i>CBLB</i>                         |
| <i>EZH2</i>                                        | <i>CBLC</i>                         |
| <i>IKZF1</i>                                       | <i>CSF3R</i>                        |
| <i>KDM6A</i>                                       | <i>FBXW7</i>                        |
| <i>PHF6</i>                                        | <i>FLT3</i>                         |
| <i>RAD21</i>                                       | <i>GATA1</i>                        |
| <i>RUNX1</i>                                       | <i>GATA2</i>                        |
| <i>STAG2</i>                                       | <i>GNAS</i>                         |
| <i>ZRSR2</i>                                       | <i>HRAS</i>                         |
|                                                    | <i>IDH1</i>                         |
|                                                    | <i>IDH2</i>                         |
|                                                    | <i>JAK2</i>                         |
|                                                    | <i>JAK3</i>                         |
|                                                    | <i>KIT</i>                          |
|                                                    | <i>KMT2A</i>                        |
|                                                    | <i>KRAS</i>                         |
|                                                    | <i>MPL</i>                          |
|                                                    | <i>MYD88</i>                        |
|                                                    | <i>NOTCH1</i>                       |
|                                                    | <i>NPM1</i>                         |
|                                                    | <i>NRAS</i>                         |
|                                                    | <i>PDGFRA</i>                       |
|                                                    | <i>PTEN</i>                         |
|                                                    | <i>PTPN11</i>                       |
|                                                    | <i>SETBP1</i>                       |
|                                                    | <i>SF3B1</i>                        |
|                                                    | <i>SMC1A</i>                        |
|                                                    | <i>SMC3</i>                         |
|                                                    | <i>SRSF2</i>                        |
|                                                    | <i>TET2</i>                         |
|                                                    | <i>TP53</i>                         |
|                                                    | <i>U2AF1</i>                        |
|                                                    | <i>WT1</i>                          |

(B)

| Hotspot coverage<br>(39/54) | Exon Coverage          |
|-----------------------------|------------------------|
| <i>ABL1</i>                 | 4-6                    |
| <i>ASXL1</i>                | 12                     |
| <i>ATRX</i>                 | 8-10 and 17-31         |
| <i>BRAF</i>                 | 15                     |
| <i>CALR</i>                 | 9                      |
| <i>CBL</i>                  | 8, 9                   |
| <i>CBLB</i>                 | 9, 10                  |
| <i>CBLC</i>                 | 9, 10                  |
| <i>CSF3R</i>                | 14-17                  |
| <i>FBXW7</i>                | 9-11                   |
| <i>FLT3</i>                 | 14, 15, 20             |
| <i>GATA1</i>                | 2                      |
| <i>GATA2</i>                | 2-6                    |
| <i>GNAS</i>                 | 8, 9                   |
| <i>HRAS</i>                 | 2, 3                   |
| <i>IDH1</i>                 | 4                      |
| <i>IDH2</i>                 | 4                      |
| <i>JAK2</i>                 | 12, 14                 |
| <i>JAK3</i>                 | 13                     |
| <i>KIT</i>                  | 2, 8-11, 13, 17        |
| <i>KMT2A</i>                | 2, 3                   |
| <i>KRAS</i>                 | 5-8                    |
| <i>MPL</i>                  | 10                     |
| <i>MYD88</i>                | 3-5                    |
| <i>NOTCH1</i>               | 26-28, 34              |
| <i>NPM1</i>                 | 12                     |
| <i>NRAS</i>                 | 2, 3                   |
| <i>PDGFRA</i>               | 12, 14, 18             |
| <i>PTEN</i>                 | 5, 7                   |
| <i>PTPN11</i>               | 3, 13                  |
| <i>SETBP1</i>               | 4 (partial)            |
| <i>SF3B1</i>                | 13-16                  |
| <i>SMC1A</i>                | 2, 11, 16, 17          |
| <i>SMC3</i>                 | 10, 13, 19, 23, 25, 28 |
| <i>SRSF2</i>                | 1                      |
| <i>TET2</i>                 | 3-11                   |
| <i>TP53</i>                 | 2-11                   |
| <i>U2AF1</i>                | 2, 6                   |
| <i>WT1</i>                  | 7, 9                   |

**Supplementary Table 2 - Annotation of variants**

| Gene   | UPN    | Transcript ID  | cDNA                                  | Protein          | Change     | VAF (%) | Read depth | Class.  |
|--------|--------|----------------|---------------------------------------|------------------|------------|---------|------------|---------|
| ASXL1  | Pt-119 | NM_015338.5    | c.1773C>A                             | p.Tyr591*        | Nonsense   | 43.2    | 7365       | HMR     |
| ASXL1  | Pt-134 | NM_015338.5    | c.1774C>T                             | p.Gln592*        | Nonsense   | 12.8    | 5226       | HMR     |
| ASXL1  | Pt-105 | NM_015338.5    | c.1849_1850delAT                      | p.Ile617*        | Nonsense   | 26.0    | 1506       | HMR     |
| ASXL1  | Pt-011 | NM_015338.5    | c.1900_1922delAGAGAGGCGGCCACCACTGCCAT | p.Glu635Argfs*15 | Frameshift | 5.3     | 950        | HMR     |
| ASXL1  | Pt-028 | NM_015338.5    | c.1900_1922delAGAGAGGCGGCCACCACTGCCAT | p.Glu635Argfs*15 | Frameshift | 11.3    | 1366       | HMR     |
| ASXL1  | Pt-049 | NM_015338.5    | c.1900_1922delAGAGAGGCGGCCACCACTGCCAT | p.Glu635Argfs*15 | Frameshift | 24.3    | 1013       | HMR     |
| ASXL1  | Pt-126 | NM_015338.5    | c.1900_1922delAGAGAGGCGGCCACCACTGCCAT | p.Glu635Argfs*15 | Frameshift | 40.0    | 1075       | HMR     |
| ASXL1  | Pt-063 | NM_015338.5    | c.1934dupG                            | p.Gly646Trpfs*12 | Frameshift | 24.5    | 3142       | HMR     |
| ASXL1  | Pt-076 | NM_015338.5    | c.1934dupG                            | p.Gly646Trpfs*12 | Frameshift | 30.3    | 6424       | HMR     |
| ASXL1  | Pt-086 | NM_015338.5    | c.1934dupG                            | p.Gly646Trpfs*12 | Frameshift | 16.2    | 5375       | HMR     |
| ASXL1  | Pt-095 | NM_015338.5    | c.1934dupG                            | p.Gly646Trpfs*12 | Frameshift | 21.2    | 6407       | HMR     |
| ASXL1  | Pt-111 | NM_015338.5    | c.1934dupG                            | p.Gly646Trpfs*12 | Frameshift | 34.9    | 5112       | HMR     |
| ASXL1  | Pt-115 | NM_015338.5    | c.1934dupG                            | p.Gly646Trpfs*12 | Frameshift | 32.5    | 3850       | HMR     |
| ASXL1  | Pt-122 | NM_015338.5    | c.1934dupG                            | p.Gly646Trpfs*12 | Frameshift | 19.1    | 5479       | HMR     |
| ASXL1  | Pt-129 | NM_015338.5    | c.1934dupG                            | p.Gly646Trpfs*12 | Frameshift | 37.8    | 4861       | HMR     |
| ASXL1  | Pt-132 | NM_015338.5    | c.1934dupG                            | p.Gly646Trpfs*12 | Frameshift | 19.1    | 4182       | HMR     |
| ASXL1  | Pt-073 | NM_015338.5    | c.1995_1998dupTGGT                    | p.Asp667Trpfs*2  | Frameshift | 39.3    | 3433       | HMR     |
| ASXL1  | Pt-069 | NM_015338.5    | c.2074C>T                             | p.Gln692*        | Nonsense   | 27.0    | 5980       | HMR     |
| ASXL1  | Pt-033 | NM_015338.5    | c.2077C>T                             | p.Arg693*        | Nonsense   | 5.9     | 4421       | HMR     |
| ASXL1  | Pt-060 | NM_015338.5    | c.2077C>T                             | p.Arg693*        | Nonsense   | 7.6     | 4786       | HMR     |
| ASXL1  | Pt-156 | NM_015338.5    | c.2077C>T                             | p.Arg693Ter      | Nonsense   | 34.9    | 3148       | HMR     |
| ASXL1  | Pt-092 | NM_015338.5    | c.2098delT                            | p.Tyr700Ilefs*3  | Nonsense   | 24.5    | 2717       | HMR     |
| ASXL1  | Pt-001 | NM_015338.5    | c.2176A>T                             | p.Lys726*        | Nonsense   | 39.5    | 6226       | HMR     |
| ASXL1  | Pt-086 | NM_015338.5    | c.2278_2279dupCA                      | p.Gln760Hisfs*13 | Frameshift | 17.3    | 4963       | HMR     |
| ASXL1  | Pt-042 | NM_015338.5    | c.2324T>G                             | p.Leu775*        | Nonsense   | 17.6    | 4593       | HMR     |
| ASXL1  | Pt-150 | NM_015338.5    | c.2387G>A                             | p.Trp796*        | Frameshift | 9.6     | 4471       | HMR     |
| ASXL1  | Pt-116 | NM_015338.5    | c.2422delC                            | p.Pro808fs       | Frameshift | 43.3    | 11357      | HMR     |
| ASXL1  | Pt-066 | NM_015338.5    | c.2423C>A                             | p.Pro808His      | Missense   | 49.2    | 5809       | Unknown |
| ASXL1  | Pt-019 | NM_015338.5    | c.2423delC                            | p.Pro808Leufs*10 | Frameshift | 36.8    | 8455       | HMR     |
| ASXL1  | Pt-024 | NM_015338.5    | c.2468delT                            | p.Leu823*        | Nonsense   | 33.8    | 10783      | HMR     |
| ASXL1  | Pt-159 | NM_015338.5    | c.2477delG                            | p.Gly826Glufs*12 | Frameshift | 40.8    | 11201      | HMR     |
| ASXL1  | Pt-057 | NM_015338.5    | c.2582delC                            | p.Ala861Aspfs*6  | Frameshift | 24.8    | 11910      | HMR     |
| ASXL1  | Pt-065 | NM_015338.5    | c.2812_2816delinsTGA                  | p.Pro938*        | Nonsense   | 21.4    | 1935       | HMR     |
| ASXL1  | Pt-055 | NM_015338.5    | c.2957A>G                             | p.Asn986Ser      | Missense   | 48.0    | 4873       | Unknown |
| ASXL1  | Pt-096 | NM_015338.5    | c.2957A>G                             | p.Asn986Ser      | Missense   | 52.8    | 5280       | Unknown |
| ASXL1  | Pt-108 | NM_015338.5    | c.3700C>T                             | p.Gln1234*       | Nonsense   | 22.8    | 7516       | HMR     |
| ASXL1  | Pt-072 | NM_015338.5    | c.4159_4162dupGCTA                    | p.Thr1388Serfs*5 | Frameshift | 35.3    | 4413       | HMR     |
| ATRX   | Pt-116 | NM_000489.3    | c.3913A>C                             | p.Lys1305Gln     | Missense   | 99.4    | 4178       | Unknown |
| ATRX   | Pt-025 | NM_000489.4    | c.5579A>G                             | p.Asn1860Ser     | Missense   | 50.3    | 3646       | Unknown |
| BCOR   | Pt-141 | NM_001123385.1 | c.3748A>T                             | p.Thr1250Ser     | Missense   | 58.3    | 1371       | Unknown |
| BCOR   | Pt-075 | NM_001123385.1 | c.4054G>A                             | p.Asp1352Asn     | Missense   | 42.6    | 1398       | Unknown |
| BCORL1 | Pt-135 | NM_021946.4    | c.1609A>T                             | p.Thr537Ser      | Missense   | 15.3    | 189        | Unknown |
| BCORL1 | Pt-126 | NM_021946.4    | c.3158A>G                             | p.Lys1053Arg     | Missense   | 99.6    | 1819       | Unknown |
| BCORL1 | Pt-019 | NM_021946.4    | c.3332C>T                             | p.Thr1111Met     | Missense   | 46.7    | 4633       | Unknown |
| BCORL1 | Pt-073 | NM_021946.4    | c.4754A>C                             | p.Gln1585Pro     | Missense   | 99.6    | 452        | Unknown |
| BCORL1 | Pt-111 | NM_021946.4    | c.5012G>C                             | p.Arg1671Thr     | Missense   | 50.2    | 7709       | Unknown |
| CALR   | Pt-011 | NM_004343.3    | c.1099_1150del                        | p.Leu367Thrfs*46 | Frameshift | 57.0    | 838        | Driver  |
| CALR   | Pt-019 | NM_004343.3    | c.1099_1150del                        | p.Leu367Thrfs*46 | Frameshift | 56.0    | 867        | Driver  |
| CALR   | Pt-028 | NM_004343.3    | c.1099_1150del                        | p.Leu367Thrfs*46 | Frameshift | 53.4    | 2184       | Driver  |
| CALR   | Pt-058 | NM_004343.3    | c.1099_1150del                        | p.Leu367Thrfs*46 | Frameshift | 58.0    | 1842       | Driver  |
| CALR   | Pt-065 | NM_004343.3    | c.1099_1150del                        | p.Leu367Thrfs*46 | Frameshift | 52.0    | 1022       | Driver  |
| CALR   | Pt-086 | NM_004343.3    | c.1099_1150del                        | p.Leu367Thrfs*46 | Frameshift | 56.6    | 2136       | Driver  |
| CALR   | Pt-099 | NM_004343.3    | c.1099_1150del                        | p.Leu367Thrfs*46 | Frameshift | 34.4    | 1738       | Driver  |

|        |        |             |                               |                    |                    |      |       |           |
|--------|--------|-------------|-------------------------------|--------------------|--------------------|------|-------|-----------|
| CALR   | Pt-143 | NM_004343.3 | c.1099_1150del                | p.Leu367Thrfs*46   | Frameshift         | 52.3 | 1081  | Driver    |
| CALR   | Pt-148 | NM_004343.3 | c.1099_1150del                | p.Leu367Thrfs*46   | Frameshift         | 15.1 | 1548  | Driver    |
| CALR   | Pt-156 | NM_004343.3 | c.1099_1150del                | p.Leu367fs         | Frameshift         | 59.2 | 776   | Driver    |
| CALR   | Pt-092 | NM_004343.3 | c.1142A>C                     | p.Glu381Ala        | Missense           | 50.1 | 876   | Unknown   |
| CALR   | Pt-115 | NM_004343.3 | c.1154_1155insTTGTC           | p.Lys385Asnfs*47   | Frameshift         | 46.3 | 937   | Driver    |
| CALR   | Pt-129 | NM_004343.3 | c.1154_1155insTTGTC           | p.Lys385Asnfs*47   | Frameshift         | 52.9 | 1102  | Driver    |
| CALR   | Pt-159 | NM_004343.3 | c.1154_1155insTTGTC           | p.Lys385Asnfs*47   | Frameshift         | 60.7 | 2243  | Driver    |
| CALR   | Pt-120 | NM_004343.3 | c.1188_1190delGGA             | p.Glu396del        | In-Frame Deletion  | 35.7 | 1039  | Unknown   |
| CALR   | Pt-141 | NM_004343.3 | c.1103_1136del                | p.Lys368Argfs*51   | Frameshift         | 54.0 | 1516  | Driver    |
| CBL    | Pt-115 | NM_005188.3 | c.1096-1G>T                   | p.?                | Splice site        | 58.7 | 6542  | Oncogenic |
| CBL    | Pt-154 | NM_005188.3 | c.1127C>T                     | p.Ser376Phe        | Missense           | 9.4  | 5678  | Oncogenic |
| CBL    | Pt-154 | NM_005188.3 | c.1139T>C                     | p.Leu380Pro        | Missense           | 24.1 | 5690  | Oncogenic |
| CBL    | Pt-089 | NM_005188.3 | c.1142G>A                     | p.Cys381Tyr        | Missense           | 80.0 | 7337  | Oncogenic |
| CBL    | Pt-157 | NM_005188.3 | c.1228-2A>G                   | p.?                | Splice site        | 7.8  | 2794  | Oncogenic |
| CBL    | Pt-145 | NM_005188.3 | c.1259G>A                     | p.Arg420Gln        | Missense           | 12.0 | 3851  | Oncogenic |
| CBL    | Pt-148 | NM_005188.3 | c.1380_1382dupTGA             | p.Asp460dup        | In-Frame Insertion | 40.8 | 4119  | Unknown   |
| CEBPA  | Pt-093 | NM_004364.3 | c.555_593del                  | p.Pro186_Pro198del | In-Frame Deletion  | 11.9 | 244   | Unknown   |
| CSF3R  | Pt-063 | NM_156039.3 | c.1853C>T                     | p.Thr618Ile        | Missense           | 23.9 | 2484  | Oncogenic |
| CSF3R  | Pt-119 | NM_156039.3 | c.2087T>C                     | p.Met696Thr        | Missense           | 48.8 | 2146  | Unknown   |
| CSF3R  | Pt-019 | NM_156039.3 | c.2503G>A                     | p.Glu835Lys        | Missense           | 49.0 | 3195  | Unknown   |
| CUX1   | Pt-029 | NM_181552.3 | c.2565_2573dup                | p.Ser857_Gly859dup | In-Frame Insertion | 40.0 | 4507  | Unknown   |
| CUX1   | Pt-063 | NM_181552.3 | c.2646G>A                     | p.Trp882*          | Nonsense           | 29.4 | 2810  | Oncogenic |
| CUX1   | Pt-024 | NM_181552.3 | c.512A>C                      | p.Asp171Ala        | Missense           | 19.5 | 118   | Unknown   |
| DNMT3A | Pt-113 | NM_022552.4 | c.1009T>C                     | p.Ser337Pro        | Missense           | 29.1 | 2121  | Oncogenic |
| DNMT3A | Pt-121 | NM_022552.4 | c.1903C>T                     | p.Arg635Trp        | Missense           | 9.4  | 3004  | Oncogenic |
| DNMT3A | Pt-116 | NM_022552.4 | c.2270delA                    | p.Asn757fs         | Frameshift         | 45.4 | 5926  | Oncogenic |
| DNMT3A | Pt-121 | NM_022552.4 | c.2375G>A                     | p.Arg792His        | Missense           | 28.3 | 4738  | Oncogenic |
| DNMT3A | Pt-070 | NM_022552.4 | c.2645G>A                     | p.Arg882His        | Missense           | 46.3 | 3440  | Oncogenic |
| DNMT3A | Pt-139 | NM_022552.4 | c.2645G>A                     | p.Arg882His        | Missense           | 3.8  | 2630  | Oncogenic |
| DNMT3A | Pt-121 | NM_022552.4 | c.2657A>G                     | p.Gln886Arg        | Missense           | 16.2 | 3198  | Oncogenic |
| DNMT3A | Pt-114 | NM_022552.4 | c.852C>G                      | p.Tyr284*          | Nonsense           | 49.0 | 9283  | Oncogenic |
| ETV6   | Pt-030 | NM_001987.4 | c.517_518insTTTAT             | p.Pro173Leufs*38   | Frameshift         | 34.9 | 2573  | Oncogenic |
| ETV6   | Pt-072 | NM_001987.4 | c.602T>C                      | p.Leu201Pro        | Missense           | 42.7 | 1961  | Unknown   |
| EZH2   | Pt-070 | NM_004456.4 | c.1198_1203delAAAGAA          | p.Lys400_Glu401del | In-Frame Deletion  | 42.5 | 2031  | Unknown   |
| EZH2   | Pt-121 | NM_004456.4 | c.1370G>A                     | p.Cys457Tyr        | Missense           | 15.2 | 2868  | Unknown   |
| EZH2   | Pt-121 | NM_004456.4 | c.1440delC                    | p.Ser480Argfs*3    | Frameshift         | 14.4 | 8156  | HMR       |
| EZH2   | Pt-148 | NM_004456.4 | c.1655G>A                     | p.Cys552Tyr        | Missense           | 11.6 | 8998  | HMR       |
| EZH2   | Pt-129 | NM_004456.4 | c.166_167dupTT                | p.Leu56Phefs*2     | Frameshift         | 92.7 | 3736  | HMR       |
| EZH2   | Pt-116 | NM_004456.4 | c.2007C>G                     | p.Ser669Arg        | Missense           | 42.0 | 3852  | HMR       |
| EZH2   | Pt-095 | NM_004456.4 | c.2042_2056delATGCAACCCGCAAGG | p.Asp681_Lys685del | In-Frame Deletion  | 14.3 | 5743  | Unknown   |
| EZH2   | Pt-073 | NM_004456.4 | c.2050C>T                     | p.Arg684Cys        | Missense           | 25.0 | 5109  | HMR       |
| EZH2   | Pt-089 | NM_004456.4 | c.2199C>A                     | p.Tyr733*          | Nonsense           | 82.0 | 1135  | HMR       |
| EZH2   | Pt-150 | NM_004456.4 | c.2233G>A                     | p.Glu745Lys        | Missense           | 16.0 | 1055  | Unknown   |
| EZH2   | Pt-144 | NM_004456.4 | c.247-1G>A                    | p.?                | Splice site        | 92.3 | 1467  | HMR       |
| EZH2   | Pt-069 | NM_004456.4 | c.667delA                     | p.Ile223Phefs*18   | Frameshift         | 54.4 | 10501 | HMR       |
| GATA2  | Pt-039 | NM_032638.4 | c.1108delT                    | p.Cys370Alafs*17   | Frameshift         | 23.4 | 222   | Oncogenic |
| GATA2  | Pt-072 | NM_032638.4 | c.121C>G                      | p.Pro41Ala         | Missense           | 47.2 | 2693  | Unknown   |
| GATA2  | Pt-126 | NM_032638.4 | c.40C>T                       | p.Pro14Ser         | Missense           | 51.9 | 2374  | Unknown   |
| GATA2  | Pt-124 | NM_032638.4 | c.494A>T                      | p.His165Leu        | Missense           | 19.8 | 106   | Unknown   |
| GNAS   | Pt-022 | NM_000516.4 | c.602G>A                      | p.Arg201His        | Missense           | 17.0 | 4243  | Oncogenic |
| IDH1   | Pt-021 | NM_005896.3 | c.395G>A                      | p.Arg132His        | Missense           | 4.5  | 3767  | HMR       |
| IDH1   | Pt-078 | NM_002168.3 | c.419G>A                      | p.Arg140Gln        | Missense           | 2.0  | 4655  | HMR       |
| IDH1   | Pt-103 | NM_002168.3 | c.419G>A                      | p.Arg140Gln        | Missense           | 43.2 | 4581  | HMR       |
| IDH1   | Pt-114 | NM_002168.3 | c.419G>A                      | p.Arg140Gln        | Missense           | 4.1  | 4826  | HMR       |
| JAK2   | Pt-001 | NM_004972.3 | c.1849G>T                     | p.Val617Phe        | Missense           | 39.2 | 1907  | Driver    |
| JAK2   | Pt-008 | NM_004972.3 | c.1849G>T                     | p.Val617Phe        | Missense           | 87.9 | 8907  | Driver    |
| JAK2   | Pt-010 | NM_004972.3 | c.1849G>T                     | p.Val617Phe        | Missense           | 43.4 | 5118  | Driver    |

|      |        |             |           |             |          |      |      |        |
|------|--------|-------------|-----------|-------------|----------|------|------|--------|
| JAK2 | Pt-014 | NM_004972.3 | c.1849G>T | p.Val617Phe | Missense | 30.1 | 3676 | Driver |
| JAK2 | Pt-018 | NM_004972.3 | c.1849G>T | p.Val617Phe | Missense | 53.3 | 5324 | Driver |
| JAK2 | Pt-020 | NM_004972.3 | c.1849G>T | p.Val617Phe | Missense | 59.0 | 3894 | Driver |
| JAK2 | Pt-021 | NM_004972.3 | c.1849G>T | p.Val617Phe | Missense | 56.2 | 4841 | Driver |
| JAK2 | Pt-022 | NM_004972.3 | c.1849G>T | p.Val617Phe | Missense | 32.2 | 3970 | Driver |
| JAK2 | Pt-024 | NM_004972.3 | c.1849G>T | p.Val617Phe | Missense | 34.4 | 6104 | Driver |
| JAK2 | Pt-025 | NM_004972.3 | c.1849G>T | p.Val617Phe | Missense | 56.3 | 2542 | Driver |
| JAK2 | Pt-029 | NM_004972.3 | c.1849G>T | p.Val617Phe | Missense | 45.2 | 4492 | Driver |
| JAK2 | Pt-033 | NM_004972.3 | c.1849G>T | p.Val617Phe | Missense | 26.7 | 5690 | Driver |
| JAK2 | Pt-039 | NM_004972.3 | c.1849G>T | p.Val617Phe | Missense | 26.1 | 4162 | Driver |
| JAK2 | Pt-040 | NM_004972.3 | c.1849G>T | p.Val617Phe | Missense | 43.0 | 5735 | Driver |
| JAK2 | Pt-042 | NM_004972.3 | c.1849G>T | p.Val617Phe | Missense | 25.4 | 4803 | Driver |
| JAK2 | Pt-043 | NM_004972.3 | c.1849G>T | p.Val617Phe | Missense | 83.3 | 4331 | Driver |
| JAK2 | Pt-048 | NM_004972.3 | c.1849G>T | p.Val617Phe | Missense | 43.0 | 3808 | Driver |
| JAK2 | Pt-049 | NM_004972.3 | c.1849G>T | p.Val617Phe | Missense | 44.4 | 4260 | Driver |
| JAK2 | Pt-051 | NM_004972.3 | c.1849G>T | p.Val617Phe | Missense | 49.4 | 3979 | Driver |
| JAK2 | Pt-053 | NM_004972.3 | c.1849G>T | p.Val617Phe | Missense | 62.4 | 4039 | Driver |
| JAK2 | Pt-055 | NM_004972.3 | c.1849G>T | p.Val617Phe | Missense | 85.0 | 3317 | Driver |
| JAK2 | Pt-057 | NM_004972.3 | c.1849G>T | p.Val617Phe | Missense | 51.0 | 4455 | Driver |
| JAK2 | Pt-059 | NM_004972.3 | c.1849G>T | p.Val617Phe | Missense | 35.8 | 5362 | Driver |
| JAK2 | Pt-060 | NM_004972.3 | c.1849G>T | p.Val617Phe | Missense | 16.8 | 5326 | Driver |
| JAK2 | Pt-062 | NM_004972.3 | c.1849G>T | p.Val617Phe | Missense | 54.9 | 4016 | Driver |
| JAK2 | Pt-064 | NM_004972.3 | c.1849G>T | p.Val617Phe | Missense | 9.0  | 7209 | Driver |
| JAK2 | Pt-066 | NM_004972.3 | c.1849G>T | p.Val617Phe | Missense | 35.4 | 3578 | Driver |
| JAK2 | Pt-068 | NM_004972.3 | c.1849G>T | p.Val617Phe | Missense | 86.1 | 3374 | Driver |
| JAK2 | Pt-069 | NM_004972.3 | c.1849G>T | p.Val617Phe | Missense | 63.3 | 7016 | Driver |
| JAK2 | Pt-070 | NM_004972.3 | c.1849G>T | p.Val617Phe | Missense | 69.1 | 5393 | Driver |
| JAK2 | Pt-072 | NM_004972.3 | c.1849G>T | p.Val617Phe | Missense | 61.4 | 4920 | Driver |
| JAK2 | Pt-073 | NM_004972.3 | c.1849G>T | p.Val617Phe | Missense | 87.9 | 5064 | Driver |
| JAK2 | Pt-074 | NM_004972.3 | c.1849G>T | p.Val617Phe | Missense | 55.3 | 6058 | Driver |
| JAK2 | Pt-075 | NM_004972.3 | c.1849G>T | p.Val617Phe | Missense | 53.8 | 1757 | Driver |
| JAK2 | Pt-076 | NM_004972.3 | c.1849G>T | p.Val617Phe | Missense | 80.2 | 2567 | Driver |
| JAK2 | Pt-078 | NM_004972.3 | c.1849G>T | p.Val617Phe | Missense | 61.9 | 4140 | Driver |
| JAK2 | Pt-079 | NM_004972.3 | c.1849G>T | p.Val617Phe | Missense | 8.9  | 5663 | Driver |
| JAK2 | Pt-087 | NM_004972.3 | c.1849G>T | p.Val617Phe | Missense | 71.2 | 3972 | Driver |
| JAK2 | Pt-088 | NM_004972.3 | c.1849G>T | p.Val617Phe | Missense | 27.2 | 2617 | Driver |
| JAK2 | Pt-089 | NM_004972.3 | c.1849G>T | p.Val617Phe | Missense | 9.6  | 5387 | Driver |
| JAK2 | Pt-091 | NM_004972.3 | c.1849G>T | p.Val617Phe | Missense | 93.9 | 4734 | Driver |
| JAK2 | Pt-092 | NM_004972.3 | c.1849G>T | p.Val617Phe | Missense | 72.7 | 3533 | Driver |
| JAK2 | Pt-093 | NM_004972.3 | c.1849G>T | p.Val617Phe | Missense | 43.4 | 5062 | Driver |
| JAK2 | Pt-095 | NM_004972.3 | c.1849G>T | p.Val617Phe | Missense | 45.4 | 4640 | Driver |
| JAK2 | Pt-096 | NM_004972.3 | c.1849G>T | p.Val617Phe | Missense | 90.0 | 3596 | Driver |
| JAK2 | Pt-098 | NM_004972.3 | c.1849G>T | p.Val617Phe | Missense | 25.9 | 5825 | Driver |
| JAK2 | Pt-100 | NM_004972.3 | c.1849G>T | p.Val617Phe | Missense | 46.0 | 3765 | Driver |
| JAK2 | Pt-104 | NM_004972.3 | c.1849G>T | p.Val617Phe | Missense | 29.7 | 1311 | Driver |
| JAK2 | Pt-106 | NM_004972.3 | c.1849G>T | p.Val617Phe | Missense | 19.9 | 4363 | Driver |
| JAK2 | Pt-107 | NM_004972.3 | c.1849G>T | p.Val617Phe | Missense | 2.5  | 1194 | Driver |
| JAK2 | Pt-108 | NM_004972.3 | c.1849G>T | p.Val617Phe | Missense | 47.6 | 4734 | Driver |
| JAK2 | Pt-111 | NM_004972.3 | c.1849G>T | p.Val617Phe | Missense | 72.4 | 4145 | Driver |
| JAK2 | Pt-113 | NM_004972.3 | c.1849G>T | p.Val617Phe | Missense | 62.2 | 4095 | Driver |
| JAK2 | Pt-114 | NM_004972.3 | c.1849G>T | p.Val617Phe | Missense | 74.3 | 8099 | Driver |
| JAK2 | Pt-116 | NM_004972.3 | c.1849G>T | p.Val617Phe | Missense | 91.0 | 3866 | Driver |
| JAK2 | Pt-118 | NM_004972.3 | c.1849G>T | p.Val617Phe | Missense | 50.9 | 5150 | Driver |
| JAK2 | Pt-119 | NM_004972.3 | c.1849G>T | p.Val617Phe | Missense | 62.2 | 1826 | Driver |
| JAK2 | Pt-121 | NM_004972.3 | c.1849G>T | p.Val617Phe | Missense | 1.5  | 4351 | Driver |
| JAK2 | Pt-122 | NM_004972.3 | c.1849G>T | p.Val617Phe | Missense | 24.4 | 3710 | Driver |
| JAK2 | Pt-123 | NM_004972.3 | c.1849G>T | p.Val617Phe | Missense | 61.6 | 6002 | Driver |

|        |        |                |                           |                   |                   |      |       |           |
|--------|--------|----------------|---------------------------|-------------------|-------------------|------|-------|-----------|
| JAK2   | Pt-124 | NM_004972.3    | c.1849G>T                 | p.Val617Phe       | Missense          | 24.3 | 4936  | Driver    |
| JAK2   | Pt-125 | NM_004972.3    | c.1849G>T                 | p.Val617Phe       | Missense          | 18.3 | 5462  | Driver    |
| JAK2   | Pt-126 | NM_004972.3    | c.1849G>T                 | p.Val617Phe       | Missense          | 43.9 | 4355  | Driver    |
| JAK2   | Pt-127 | NM_004972.3    | c.1849G>T                 | p.Val617Phe       | Missense          | 22.9 | 7382  | Driver    |
| JAK2   | Pt-128 | NM_004972.3    | c.1849G>T                 | p.Val617Phe       | Missense          | 29.8 | 5980  | Driver    |
| JAK2   | Pt-130 | NM_004972.3    | c.1849G>T                 | p.Val617Phe       | Missense          | 36.9 | 5070  | Driver    |
| JAK2   | Pt-132 | NM_004972.3    | c.1849G>T                 | p.Val617Phe       | Missense          | 41.3 | 4223  | Driver    |
| JAK2   | Pt-134 | NM_004972.3    | c.1849G>T                 | p.Val617Phe       | Missense          | 4.4  | 3618  | Driver    |
| JAK2   | Pt-135 | NM_004972.3    | c.1849G>T                 | p.Val617Phe       | Missense          | 84.3 | 5593  | Driver    |
| JAK2   | Pt-136 | NM_004972.3    | c.1849G>T                 | p.Val617Phe       | Missense          | 83.4 | 5430  | Driver    |
| JAK2   | Pt-139 | NM_004972.3    | c.1849G>T                 | p.Val617Phe       | Missense          | 77.7 | 3320  | Driver    |
| JAK2   | Pt-140 | NM_004972.3    | c.1849G>T                 | p.Val617Phe       | Missense          | 35.6 | 6196  | Driver    |
| JAK2   | Pt-142 | NM_004972.3    | c.1849G>T                 | p.Val617Phe       | Missense          | 58.8 | 4341  | Driver    |
| JAK2   | Pt-144 | NM_004972.3    | c.1849G>T                 | p.Val617Phe       | Missense          | 48.7 | 5175  | Driver    |
| JAK2   | Pt-147 | NM_004972.3    | c.1849G>T                 | p.Val617Phe       | Missense          | 3.9  | 5292  | Driver    |
| JAK2   | Pt-152 | NM_004972.3    | c.1849G>T                 | p.Val617Phe       | Missense          | 7.2  | 4394  | Driver    |
| JAK2   | Pt-154 | NM_004972.3    | c.1849G>T                 | p.Val617Phe       | Missense          | 20.3 | 7520  | Driver    |
| JAK2   | Pt-155 | NM_004972.3    | c.1849G>T                 | p.Val617Phe       | Missense          | 92.0 | 5573  | Driver    |
| JAK2   | Pt-157 | NM_004972.3    | c.1849G>T                 | p.Val617Phe       | Missense          | 86.8 | 2821  | Driver    |
| KDM6A  | Pt-086 | NM_021140.3    | c.2177C>T                 | p.Thr726Met       | Missense          | 48.3 | 3359  | Unknown   |
| KDM6A  | Pt-120 | NM_021140.3    | c.2423A>G                 | p.His808Arg       | Missense          | 53.3 | 14228 | Unknown   |
| KIT    | Pt-119 | NM_000222.2    | c.1588G>A                 | p.Val530Ile       | Missense          | 50.2 | 3437  | Unknown   |
| KIT    | Pt-121 | NM_000222.2    | c.1961T>C                 | p.Val654Ala       | Missense          | 15.5 | 4253  | Unknown   |
| KMT2A  | Pt-154 | NM_001197104.1 | c.200_202delCGG           | p.p.Ala67del      | In-frame deletion | 78.5 | 391   | Unknown   |
| MPL    | Pt-150 | NM_005373.2    | c.1514G>A                 | p.Ser505Asn       | Missense          | 39.3 | 2788  | Driver    |
| MPL    | Pt-105 | NM_005373.2    | c.1543_1544delinsAA       | p.Trp515Lys       | Missense          | 54.2 | 3298  | Driver    |
| MPL    | Pt-030 | NM_005373.2    | c.1544G>T                 | p.Trp515Leu       | Missense          | 79.8 | 3175  | Driver    |
| MPL    | Pt-058 | NM_005373.2    | c.1544G>T                 | p.Trp515Leu       | Missense          | 42.9 | 2429  | Driver    |
| MPL    | Pt-063 | NM_005373.2    | c.1544G>T                 | p.Trp515Leu       | Missense          | 17.9 | 2588  | Driver    |
| MPL    | Pt-103 | NM_005373.2    | c.1544G>T                 | p.Trp515Leu       | Missense          | 81.6 | 2904  | Driver    |
| NOTCH1 | Pt-065 | NM_017617.3    | c.6205G>A                 | p.Ala2069Thr      | Missense          | 48.9 | 1305  | Unknown   |
| NOTCH1 | Pt-143 | NM_017617.3    | c.7289G>C                 | p.Gly2430Ala      | Missense          | 49.4 | 1533  | Unknown   |
| NOTCH1 | Pt-029 | NM_017617.3    | c.7387G>A                 | p.Ala2463Thr      | Missense          | 48.0 | 2220  | Unknown   |
| NPM1   | Pt-075 | NM_002520.6    | c.860_863dupTCTG          | p.Trp288Cysfs*12  | Frameshift        | 3.2  | 1300  | Oncogenic |
| NRAS   | Pt-145 | NM_002524.3    | c.182A>C                  | p.Gln61Pro        | Missense          | 5.6  | 341   | Oncogenic |
| NRAS   | Pt-057 | NM_002524.3    | c.208C>T                  | p.Gln70*          | Nonsense          | 33.7 | 555   | Unknown   |
| NRAS   | Pt-053 | NM_002524.3    | c.34G>A                   | p.Gly12Ser        | Missense          | 1.6  | 8160  | Oncogenic |
| NRAS   | Pt-087 | NM_002524.3    | c.35G>A                   | p.Gly12Asp        | Missense          | 17.2 | 9418  | Oncogenic |
| NRAS   | Pt-115 | NM_002524.3    | c.35G>A                   | p.Gly12Asp        | Missense          | 11.3 | 8306  | Oncogenic |
| NRAS   | Pt-087 | NM_002524.3    | c.35G>C                   | p.Gly12Ala        | Missense          | 6.7  | 9418  | Oncogenic |
| NRAS   | Pt-145 | NM_002524.3    | c.35G>C                   | p.Gly12Ala        | Missense          | 4.8  | 9260  | Oncogenic |
| NRAS   | Pt-069 | NM_002524.3    | c.35G>T                   | p.Gly12Val        | Missense          | 27.8 | 9193  | Oncogenic |
| NRAS   | Pt-087 | NM_002524.3    | c.37G>C                   | p.Gly13Arg        | Missense          | 5.8  | 9440  | Oncogenic |
| PDGFRA | Pt-069 | NM_006206.4    | c.1775G>A                 | p.Gly592Glu       | Missense          | 13.5 | 1413  | Unknown   |
| PDGFRA | Pt-001 | NM_006206.4    | c.2540C>T                 | p.Ser847Leu       | Missense          | 51.1 | 8939  | Unknown   |
| PHF6   | Pt-049 | NM_032458.2    | c.751C>A                  | p.Gln251Lys       | Missense          | 21.2 | 2934  | Oncogenic |
| PHF6   | Pt-057 | NM_032458.2    | c.821G>A                  | p.Arg274Gln       | Missense          | 22.0 | 1948  | Oncogenic |
| PHF6   | Pt-069 | NM_032458.2    | c.839G>A                  | p.Cys280Tyr       | Missense          | 25.4 | 857   | Oncogenic |
| PTEN   | Pt-075 | NM_000314.4    | c.734A>G                  | p.Gln245Arg       | Missense          | 25.0 | 164   | Oncogenic |
| PTPN11 | Pt-156 | NM_002834.3    | c.1471C>T                 | p.Pro491Ser       | Missense          | 41.8 | 6807  | Oncogenic |
| PTPN11 | Pt-029 | NM_002834.3    | c.1504T>G                 | p.Ser502Ala       | Missense          | 43.7 | 9549  | Oncogenic |
| RAD21  | Pt-143 | NM_006265.2    | c.1242T>G                 | p.Asp414Glu       | Missense          | 47.4 | 1558  | Unknown   |
| RAD21  | Pt-030 | NM_006265.2    | c.253A>G                  | p.Ile85Val        | Missense          | 6.5  | 4787  | Unknown   |
| RUNX1  | Pt-060 | NM_001754.4    | c.1355T>G                 | p.Val452Gly       | Missense          | 57.3 | 2234  | Unknown   |
| RUNX1  | Pt-057 | NM_001754.4    | c.1426_1436delGTGTGGAGGCC | p.Val476Leufs*120 | Frameshift        | 12.3 | 2327  | Oncogenic |
| SETBP1 | Pt-030 | NM_015559.2    | c.2602G>A                 | p.Asp868Asn       | Missense          | 17.1 | 3662  | Oncogenic |
| SETBP1 | Pt-089 | NM_015559.2    | c.2612T>C                 | p.Ile871Thr       | Missense          | 39.7 | 4551  | Oncogenic |

|       |        |                |                         |                      |                   |       |       |           |
|-------|--------|----------------|-------------------------|----------------------|-------------------|-------|-------|-----------|
| SF3B1 | Pt-106 | NM_012433.2    | c.1997A>G               | p.Lys666Arg          | Missense          | 31.7  | 3081  | Oncogenic |
| SF3B1 | Pt-070 | NM_012433.2    | c.1997A>T               | p.Lys666Met          | Missense          | 43.2  | 4166  | Oncogenic |
| SF3B1 | Pt-068 | NM_012433.2    | c.1998G>C               | p.Lys666Asn          | Missense          | 44.4  | 2639  | Oncogenic |
| SF3B1 | Pt-096 | NM_012433.2    | c.1998G>C               | p.Lys666Asn          | Missense          | 47.1  | 3135  | Oncogenic |
| SF3B1 | Pt-115 | NM_012433.2    | c.1998G>C               | p.Lys666Asn          | Missense          | 14.3  | 5305  | Oncogenic |
| SF3B1 | Pt-123 | NM_012433.2    | c.1998G>C               | p.Lys666Asn          | Missense          | 46.2  | 5833  | Oncogenic |
| SF3B1 | Pt-064 | NM_012433.2    | c.1998G>T               | p.Lys666Asn          | Missense          | 8.0   | 4590  | Oncogenic |
| SF3B1 | Pt-074 | NM_012433.2    | c.1998G>T               | p.Lys666Asn          | Missense          | 40.0  | 3919  | Oncogenic |
| SF3B1 | Pt-091 | NM_012433.2    | c.1998G>T               | p.Lys666Asn          | Missense          | 45.2  | 3121  | Oncogenic |
| SF3B1 | Pt-128 | NM_012433.2    | c.1998G>T               | p.Lys666Asn          | Missense          | 25.1  | 5261  | Oncogenic |
| SF3B1 | Pt-028 | NM_012433.2    | c.2098A>G               | p.Lys700Glu          | Missense          | 2.5   | 8728  | Oncogenic |
| SF3B1 | Pt-062 | NM_012433.2    | c.2098A>G               | p.Lys700Glu          | Missense          | 36.0  | 9884  | Oncogenic |
| SF3B1 | Pt-150 | NM_012433.2    | c.2098A>G               | p.Lys700Glu          | Missense          | 19.4  | 7137  | Oncogenic |
| SRSF2 | Pt-079 | NM_001195427.1 | c.283C>G                | p.Pro95Ala           | Missense          | 10.4  | 1754  | HMR       |
| SRSF2 | Pt-157 | NM_001195427.1 | c.284C>A                | p.Pro95His           | Missense          | 9.2   | 993   | HMR       |
| SRSF2 | Pt-063 | NM_001195427.1 | c.284C>G                | p.Pro95Arg           | Missense          | 43.8  | 1015  | HMR       |
| SRSF2 | Pt-072 | NM_001195427.1 | c.284C>G                | p.Pro95Arg           | Missense          | 30.8  | 1387  | HMR       |
| SRSF2 | Pt-057 | NM_001195427.1 | c.284C>T                | p.Pro95Leu           | Missense          | 2.9   | 1623  | HMR       |
| SRSF2 | Pt-103 | NM_001195427.1 | c.284C>T                | p.Pro95Leu           | Missense          | 34.5  | 1006  | HMR       |
| SRSF2 | Pt-119 | NM_001195427.1 | c.284C>T                | p.Pro95Leu           | Missense          | 42.1  | 2388  | HMR       |
| SRSF2 | Pt-058 | NM_001195427.1 | c.320C>A                | p.Pro107His          | Missense          | 5.5   | 842   | Unknown   |
| STAG2 | Pt-111 | NM_001042749.2 | c.1535-3_1535-2insA     | p.?                  | Intronic          | 23.7  | 2533  | Unknown   |
| STAG2 | Pt-030 | NM_001042749.2 | c.353T>C                | p.Ile118Thr          | Missense          | 100.0 | 607   | Unknown   |
| TET2  | Pt-116 | NM_001127208.2 | c.1143delC              | p.Phe381fs           | Frameshift        | 42.9  | 4951  | Oncogenic |
| TET2  | Pt-157 | NM_001127208.2 | c.1292delT              | p.Leu431*            | Nonsense          | 47.2  | 4478  | Oncogenic |
| TET2  | Pt-048 | NM_001127208.2 | c.1318C>T               | p.Gln440*            | Nonsense          | 36.5  | 4993  | Oncogenic |
| TET2  | Pt-121 | NM_001127208.2 | c.1664dupC              | p.Thr556Asnfs*11     | Frameshift        | 9.4   | 2576  | Oncogenic |
| TET2  | Pt-043 | NM_001127208.2 | c.2020C>T               | p.Gln674*            | Nonsense          | 37.7  | 11027 | Oncogenic |
| TET2  | Pt-020 | NM_001127208.2 | c.3065dupA              | p.Ser1023Glufs*4     | Frameshift        | 35.5  | 7474  | Oncogenic |
| TET2  | Pt-058 | NM_001127208.2 | c.3184_3185insCCCAG     | p.Val1062Alafs*6     | Frameshift        | 39.6  | 4561  | Oncogenic |
| TET2  | Pt-091 | NM_001127208.2 | c.3528_3536delGATTGAAAG | p.Ile1177_Arg1179del | In-Frame Deletion | 38.8  | 7308  | Oncogenic |
| TET2  | Pt-057 | NM_001127208.2 | c.3604A>G               | p.Arg1202Gly         | Missense          | 43.0  | 3507  | Oncogenic |
| TET2  | Pt-020 | NM_001127208.2 | c.3661T>C               | p.Cys1221Arg         | Missense          | 31.6  | 2880  | Oncogenic |
| TET2  | Pt-152 | NM_001127208.2 | c.3686T>G               | p.Leu1229Arg         | Missense          | 6.8   | 3659  | Oncogenic |
| TET2  | Pt-072 | NM_001127208.2 | c.3965T>A               | p.Leu1322Gln         | Missense          | 36.8  | 10120 | Oncogenic |
| TET2  | Pt-018 | NM_001127208.2 | c.3982_3983delAA        | p.Asn1328Profs*10    | Frameshift        | 29.1  | 10789 | Oncogenic |
| TET2  | Pt-087 | NM_001127208.2 | c.4035T>G               | p.Tyr1345*           | Nonsense          | 47.9  | 6837  | Oncogenic |
| TET2  | Pt-114 | NM_001127208.2 | c.4039_4041delAAT       | p.Asn1347del         | In-Frame Deletion | 25.6  | 6895  | Oncogenic |
| TET2  | Pt-008 | NM_001127208.2 | c.4121G>A               | p.Cys1374Tyr         | Missense          | 44.2  | 3026  | Oncogenic |
| TET2  | Pt-021 | NM_001127208.2 | c.4264A>T               | p.Lys1422*           | Nonsense          | 12.8  | 3560  | Oncogenic |
| TET2  | Pt-157 | NM_001127208.2 | c.4317dupA              | p.Arg1440Thrfs*38    | Frameshift        | 44.8  | 3363  | Oncogenic |
| TET2  | Pt-142 | NM_001127208.2 | c.4546C>T               | p.Arg1516*           | Nonsense          | 23.2  | 2034  | Oncogenic |
| TET2  | Pt-093 | NM_001127208.2 | c.4624C>T               | p.Gln1542*           | Nonsense          | 14.5  | 1425  | Oncogenic |
| TET2  | Pt-010 | NM_001127208.2 | c.4894C>T               | p.Gln1632*           | Nonsense          | 12.9  | 12317 | Oncogenic |
| TET2  | Pt-150 | NM_001127208.2 | c.4913C>A               | p.Ser1638*           | Nonsense          | 19.4  | 6203  | Oncogenic |
| TET2  | Pt-127 | NM_001127208.2 | c.4946_4950delATTCT     | p.Tyr1649Serfs*10    | Frameshift        | 20.2  | 7960  | Oncogenic |
| TET2  | Pt-115 | NM_001127208.2 | c.521C>A                | p.Pro174His          | Missense          | 50.5  | 9674  | Unknown   |
| TET2  | Pt-055 | NM_001127208.2 | c.5492_5493insTA        | p.Leu1832Asnfs*2     | Frameshift        | 45.6  | 1587  | Oncogenic |
| TET2  | Pt-066 | NM_001127208.2 | c.5507_5508delTG        | p.Val1836Glyfs*9     | Frameshift        | 36.7  | 2065  | Oncogenic |
| TET2  | Pt-126 | NM_001127208.2 | c.5582G>T               | p.Gly1861Val         | Missense          | 37.8  | 1649  | Oncogenic |
| TET2  | Pt-144 | NM_001127208.2 | c.572delA               | p.Asn1911Ilefs*16    | Frameshift        | 46.8  | 10038 | Oncogenic |
| TET2  | Pt-124 | NM_001127208.2 | c.5939C>T               | p.Thr1980Ile         | Missense          | 52.6  | 4211  | Oncogenic |
| TET2  | Pt-143 | NM_001127208.2 | c.685dupA               | p.Thr229Asnfs*25     | Frameshift        | 31.1  | 10110 | Oncogenic |
| TET2  | Pt-150 | NM_001127208.2 | c.838_844delTCTAACT     | p.Ser280Leufs*11     | Frameshift        | 21.5  | 7265  | Oncogenic |
| TET2  | Pt-119 | NM_001127208.2 | c.879_882delTGAG        | p.Ser293Argfs*14     | Frameshift        | 43.0  | 7949  | Oncogenic |
| TP53  | Pt-024 | NM_000546.5    | c.1079G>T               | p.Gly360Val          | Missense          | 53.4  | 2245  | Oncogenic |
| TP53  | Pt-127 | NM_000546.5    | c.437G>A                | p.Trp146*            | Nonsense          | 13.4  | 4802  | Oncogenic |

|       |        |                |                |                  |            |      |       |           |
|-------|--------|----------------|----------------|------------------|------------|------|-------|-----------|
| TP53  | Pt-100 | NM_000546.5    | c.524G>A       | p.Arg175His      | Missense   | 36.4 | 2415  | Oncogenic |
| TP53  | Pt-055 | NM_000546.5    | c.532C>G       | p.His178Asp      | Missense   | 17.9 | 4538  | Oncogenic |
| TP53  | Pt-100 | NM_000546.5    | c.560G>T       | p.Gly187Val      | Missense   | 40.7 | 1677  | Oncogenic |
| U2AF1 | Pt-021 | NM_001025203.1 | c.101C>A       | p.Ser34Tyr       | Missense   | 6.2  | 8285  | Oncogenic |
| U2AF1 | Pt-059 | NM_001025203.1 | c.101C>A       | p.Ser34Tyr       | Missense   | 18.6 | 10740 | Oncogenic |
| U2AF1 | Pt-159 | NM_001025203.1 | c.101C>A       | p.Ser34Tyr       | Missense   | 39.4 | 7681  | Oncogenic |
| U2AF1 | Pt-024 | NM_001025203.1 | c.101C>T       | p.Ser34Phe       | Missense   | 34.2 | 8479  | Oncogenic |
| U2AF1 | Pt-076 | NM_001025203.1 | c.101C>T       | p.Ser34Phe       | Missense   | 38.1 | 3168  | Oncogenic |
| U2AF1 | Pt-001 | NM_001025203.1 | c.470A>C       | p.Gln157Pro      | Missense   | 42.1 | 934   | Oncogenic |
| U2AF1 | Pt-057 | NM_001025203.1 | c.470A>C       | p.Gln157Pro      | Missense   | 31.4 | 1770  | Oncogenic |
| U2AF1 | Pt-060 | NM_001025203.1 | c.470A>C       | p.Gln157Pro      | Missense   | 35.7 | 2158  | Oncogenic |
| U2AF1 | Pt-042 | NM_001025203.1 | c.470A>G       | p.Gln157Arg      | Missense   | 40.8 | 1677  | Oncogenic |
| U2AF1 | Pt-111 | NM_001025203.1 | c.470A>G       | p.Gln157Arg      | Missense   | 46.6 | 1734  | Oncogenic |
| WT1   | Pt-095 | NM_024426.3    | c.1390G>A      | p.Asp464Asn      | Missense   | 13.7 | 5654  | Unknown   |
| ZRSR2 | Pt-141 | NM_005089.3    | c.1354C>T      | p.Arg452Cys      | Missense   | 35.7 | 1139  | Unknown   |
| ZRSR2 | Pt-039 | NM_005089.3    | c.284C>T       | p.Ala95Val       | Missense   | 56.2 | 1200  | Unknown   |
| ZRSR2 | Pt-092 | NM_005089.3    | c.284C>T       | p.Ala95Val       | Missense   | 48.5 | 1096  | Unknown   |
| ZRSR2 | Pt-030 | NM_005089.3    | c.573_574delTA | p.His191Glnfs*12 | Frameshift | 51.3 | 3310  | Oncogenic |
| ZRSR2 | Pt-134 | NM_005089.3    | c.706T>A       | p.Phe236Ile      | Missense   | 11.8 | 3386  | Unknown   |
| ZRSR2 | Pt-126 | NM_005089.3    | c.945dupT      | p.Glu316*        | Nonsense   | 80.6 | 3099  | Oncogenic |



**Supplementary Table 3 - Univariate analysis of factors associated with Spleen Response**

| <b>Variable</b>                        |                             | <b>OR</b> | <b>95% CI</b> | <b>P value</b> |
|----------------------------------------|-----------------------------|-----------|---------------|----------------|
| Median Age (years)                     | >68 vs. ≤68                 | 0.60      | 0.26-1.37     | 0.22           |
| Hb (g/L)                               | ≥100 vs. <100               | 3.41      | 1.46-7.96     | 0.005          |
| Median WCC (10 <sup>9</sup> /L)        | >14.6 vs. ≤14.6             | 1.99      | 0.88-4.52     | 0.10           |
| Median Platelets (10 <sup>9</sup> /L)  | >199 vs. ≤199               | 0.78      | 0.34-1.74     | 0.54           |
| Median peripheral blood blasts (%)     | >1 vs. ≤1                   | 0.45      | 0.19-1.10     | 0.08           |
| Transfusion dependence                 |                             | 0.62      | 0.27-1.44     | 0.27           |
| Baseline spleen size (cm)              | ≥10 vs. <10                 | 0.59      | 0.19-1.81     | 0.35           |
| JAK Inhibitor                          | Ruxolitinib vs. Momelotinib | 0.84      | 0.33-2.16     | 0.72           |
| Diagnosis                              | (PPV-/PET-MF) vs. PMF       | 0.84      | 0.38-1.89     | 0.68           |
| DIPSS                                  | Low/Int-1 vs. Int-2         | 0.80      | 0.29-2.24     | 0.67           |
|                                        | Low/Int-1vs. High           | 0.20      | 0.06-0.66     | 0.008          |
| JAK2/MPL                               |                             | 2.07      | 0.74-5.78     | 0.16           |
| <i>CALR</i>                            |                             | 0.41      | 0.12-1.45     | 0.17           |
| <i>ASXL1</i>                           |                             | 0.54      | 0.22-1.29     | 0.17           |
| <i>SRSF2</i>                           |                             | 2.19      | 0.38-12.58    | 0.38           |
| <i>EZH2</i>                            |                             | 0.32      | 0.06-1.67     | 0.17           |
| <i>IDH1 and IDH2</i>                   |                             | 1.04      | 0.14-7.75     | 0.97           |
| <i>TET2</i>                            |                             | 0.85      | 0.33-2.14     | 0.73           |
| <i>U2AF1</i>                           |                             | 0.27      | 0.05-1.36     | 0.11           |
| <i>SF3B1</i>                           |                             | 1.26      | 0.39-4.07     | 0.70           |
| <i>DNMT3A</i>                          |                             | 0.19      | 0.02-1.70     | 0.14           |
| <i>NRAS</i>                            |                             | 0.68      | 0.11-4.28     | 0.68           |
| HMR profile                            |                             | 0.44      | 0.19-1.03     | 0.06           |
| Number of mutations (including driver) | 1 (reference)               |           |               |                |
|                                        | 2                           | 2.23      | 0.74-6.73     | 0.15           |
|                                        | ≥3                          | 0.72      | 0.22-2.31     | 0.58           |

**Supplementary Table 4 - Univariate analysis of factors associated with anemia response**

| <b>Variable</b>                              | <b>OR</b> | <b>95% CI</b> | <b>P value</b> |
|----------------------------------------------|-----------|---------------|----------------|
| Median age (years) >68 vs. ≤68               | 0.89      | 0.25-3.17     | 0.86           |
| Hb (g/L) ≥100 vs. <100                       | 2.25      | 0.13-38.3     | 0.57           |
| Median WCC (109/L) >14.6 vs. ≤14.6           | 1.01      | 0.30-3.35     | 0.99           |
| Median Platelets (109/L) >199 vs. ≤199       | 0.92      | 0.29-2.94     | 0.87           |
| Median peripheral blood blasts (%) >1 vs. ≤1 | 0.39      | 0.11-1.41     | 0.15           |
| Transfusion dependence                       | 2.24      | 0.54-9.31     | 0.27           |
| Baseline spleen size (cm) ≥10 vs. <10        | 5.77      | 0.67-49.61    | 0.11           |
| JAK Inhibitor Ruxolitinib vs. Momelotinib    | 0.68      | 0.20-2.33     | 0.54           |
| Diagnosis (PPV-/PET-MF) vs. PMF              | 1.40      | 0.43-4.58     | 0.58           |
| <i>JAK2/MPL</i>                              | 1.97      | 0.47-8.27     | 0.35           |
| <i>CALR</i>                                  | 1.11      | 0.24-5.08     | 0.90           |
| <i>ASXL1</i>                                 | 0.49      | 0.14-1.67     | 0.25           |
| <i>SRSF2</i>                                 | 2.33      | 0.30-18.14    | 0.42           |
| <i>EZH2</i>                                  | 0.40      | 0.04-3.72     | 0.42           |
| <i>IDH1/IDH2</i>                             | 2.25      | 0.13-38.26    | 0.57           |
| <i>TET2</i>                                  | 2.54      | 0.73-8.80     | 0.14           |
| <i>U2AF1</i>                                 | 0.27      | 0.03-2.37     | 0.24           |
| <i>SF3B1</i>                                 | 0.57      | 0.11-3.10     | 0.52           |
| HMR profile                                  | 0.68      | 0.21-2.15     | 0.51           |
| Number of mutations (including driver)       |           |               |                |
| 1 (reference)                                |           |               |                |
| 2                                            | 0.31      | 0.04-2.27     | 0.25           |
| ≥3                                           | 0.22      | 0.03-1.67     | 0.14           |

**Supplementary Table 5 - Interactivity Analysis**

|                                                     | <b>DIPSS</b>                    | <b>Pre-treatment<br/>Transfusion<br/>dependence</b> | <b><i>ASXL1/EZH2</i></b>        | <b>Number of<br/>mutations</b> |
|-----------------------------------------------------|---------------------------------|-----------------------------------------------------|---------------------------------|--------------------------------|
| <b>Number mutations</b>                             | Phi = 0.35<br><i>P</i> = 0.02   | Phi = 0.22<br><i>P</i> = 0.09                       | Phi = 0.53<br><i>P</i> < 0.0001 |                                |
| <b><i>ASXL1/EZH2</i></b>                            | Phi = 0.27<br><i>P</i> = 0.027  | Phi = 0.28<br><i>P</i> = 0.005                      |                                 |                                |
| <b>Pre-treatment<br/>Transfusion<br/>dependence</b> | Phi = 0.62<br><i>P</i> < 0.0001 |                                                     |                                 |                                |
| <b>DIPSS</b>                                        |                                 |                                                     |                                 |                                |

NOTE: Phi is a correlation coefficient for categorical data that ranges in value from -1 to +1

**Supplementary Figure 1 - Circos plot showing co-occurrence of mutations.** Mutations found in  $\geq 4\%$  of cohort were included. The width of segment arcs represent the relative number of interactions associated with a given gene. Ribbon thickness represents the number of pairwise interactions between a given pair of genes.

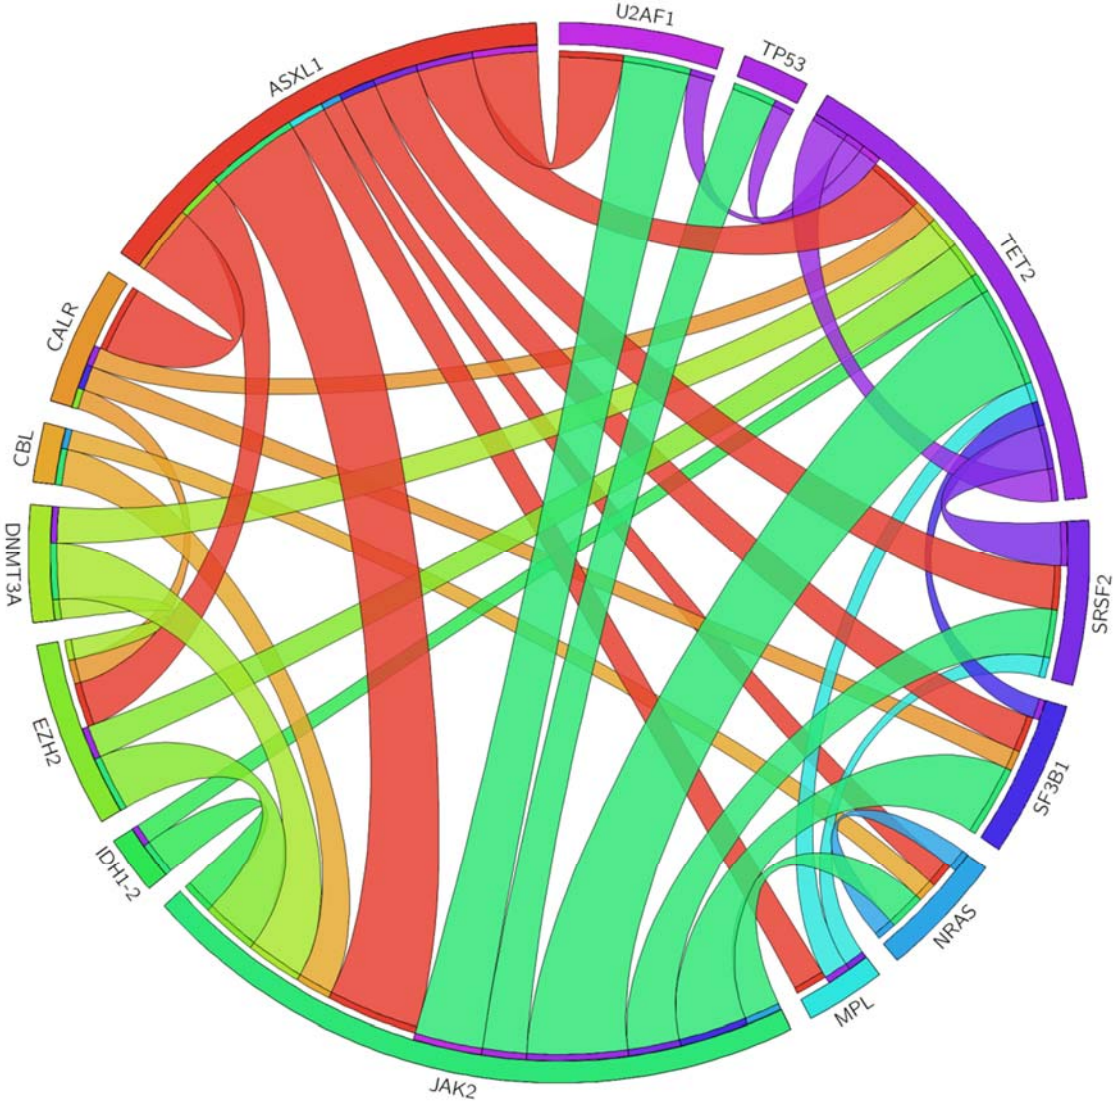

Supplement: ba009530-suppl1.pdf [file ba009530-suppl1.pdf]
